# Supplementary material for: Glycidamide Promotes the Growth and Migratory Ability of Prostate Cancer Cells by Changing the Protein Expression of Cell Cycle Regulators and Epithelial-to-Mesenchymal Transition (EMT)-Associated Proteins with Prognostic Relevance
Source: Int J Mol Sci. 2019 May 4;20(9):2199. doi: 10.3390/ijms20092199 (PMC6540322; doi:10.3390/ijms20092199)
Supplement: Supplementary file 1 [file ijms-20-02199-s001.pdf]

# Glycidamide Promotes the Growth and Migratory Ability of Prostate Cancer Cells by Changing the Protein Expression of Cell Cycle Regulators and Epithelial-to-Mesenchymal Transition (EMT)-Associated Proteins with Prognostic Relevance

Titus I. Ekanem<sup>1,2</sup>, Chi-Chen Huang<sup>3,†</sup>, Ming-Heng Wu<sup>4,†</sup>, Ding-Yen Lin<sup>5,6</sup>, Wen-Fu T. Lai<sup>7,8,9</sup> and Kuen-Haur Lee<sup>6,10,\*</sup>

<sup>1</sup>Ph.D. Program for Cancer Molecular Biology and Drug Discovery, College of Medical Science and Technology, Taipei Medical University and Academia Sinica

<sup>2</sup>Department of Hematology, University of Uyo, Uyo, Nigeria

<sup>3</sup>Graduate Institute of Neural Regenerative Medicine, College of Medical Science and Technology, Taipei Medical University, Taipei, Taiwan

<sup>4</sup>Graduate Institute of Translational Medicine, Taipei Medical University, Taipei, Taiwan.

<sup>5</sup>Department of Biotechnology and Bioindustry Sciences, College of Bioscience and Biotechnology, National Cheng Kung University, Tainan

<sup>6</sup>Graduate Institute of Cancer Biology and Drug Discovery, College of Medical Science and Technology, Taipei Medical University, Taipei, Taiwan

<sup>7</sup>McLean Imaging Center, McLean Hospital, Harvard Medical School, Belmont, MA, United States of America

<sup>8</sup>Department of Research, Taipei Medical University/Shuang-Ho Hospital, New Taipei City, Taiwan

<sup>9</sup>Department of Dentistry, Taipei Medical University/Shuang-Ho Hospital, New Taipei City, Taiwan

<sup>10</sup>Ph.D. Program for Cancer Molecular Biology and Drug Discovery, College of Medical Science and Technology, Taipei Medical University, Taipei, Taiwan

<sup>†</sup>These authors contributed equally to this work.

\* Correspondence: Dr. Kuen-Haur Lee, Graduate Institute of Cancer Biology and Drug Discovery, College of Medical Science and Technology, Taipei Medical University, No. 250 Wu-Hsing Street, Taipei 11031, Taiwan. Tel: +886-2-27361661 ext. 7627, Fax: +886-2-66387537, E-mail: khlee@tmu.edu.tw

## **Supplementary Material**

**Figure S1.** Survival analysis of prostate cancer patients with SurvExpress (n=140). Low expression of CCND1 (**A**), CDK4 (**B**), and TWIST1 (**C**) were correlated with good prognosis of prostate cancer patients. High expression of SNAI1 (**D**), SNAI2 (**E**), and CDH1 (**F**) were correlated with good prognosis of prostate cancer patients.

**Figure S2.** Kaplan–Meier curves according to any two-gene models. Clinical outcomes for the combinations of CDK4/TWIST1 (**A**), CDK4/SNAI2 (**B**), and TWIST1/SNAI2 (**C**) mRNA status of prostate cancer patients.

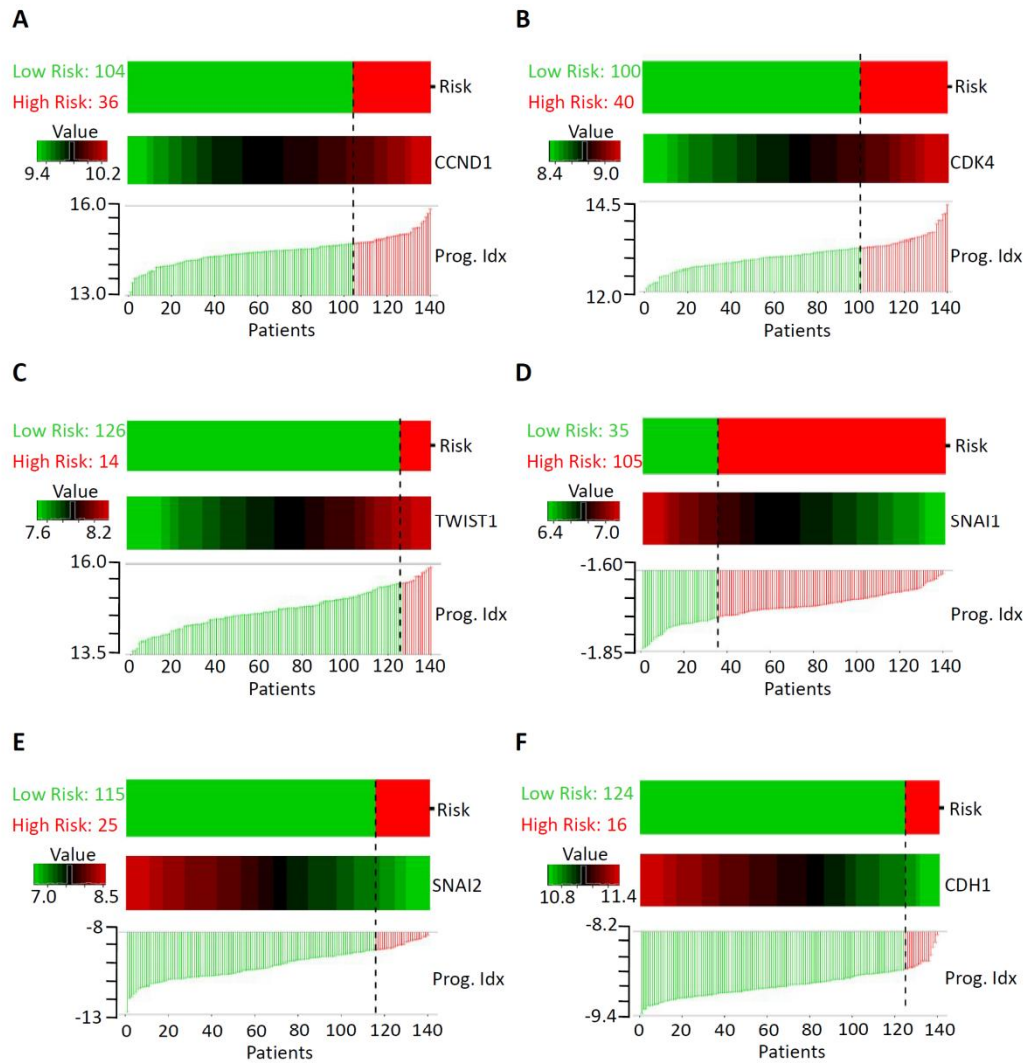

**Supplementary Fig. 1**

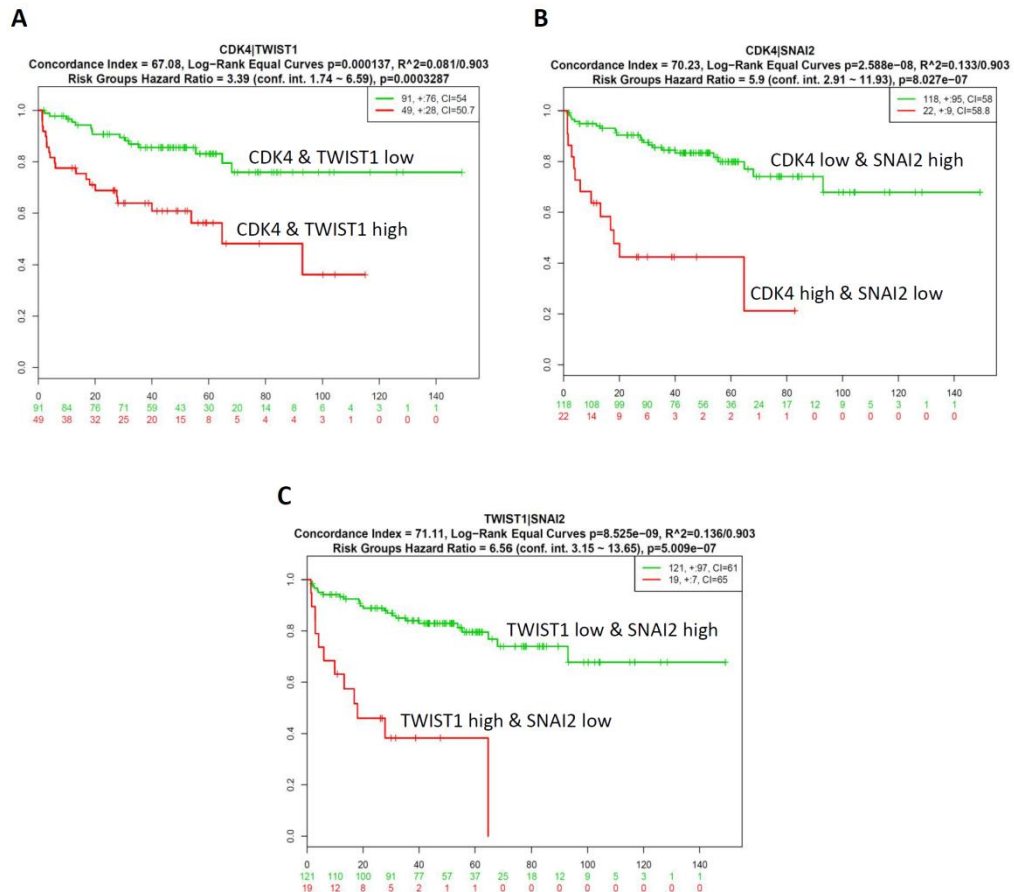

**Supplementary Fig. 2**
